# Supplementary material
Source: Springer Nature journal article supplement (https://www.springermedizin.de/resource/supplementary/12936_2007_424_MOESM1_ESM.pdf/9547416)
Supplement: MOESM1 [file 9547416]

- Collate data from studies conducted in different geographical locations
- Monitor temporal trends in clinical and parasitological efficacy
- Detect the emergence and spread of antimalarial drug resistance
- Track geographical trends in antimalarial drug efficacy, after controlling for important confounding host and parasite factors
- Develop appropriate resources, support and technologies to help researchers conduct, analyse and promptly report antimalarial efficacy studies
- Provide a tool allowing the optimization of current antimalarial treatment regimens through a better understanding of the spread of resistance and how this is influenced by host, parasite and pharmacokinetic interactions
